# Supplementary material for: CoOOH-catalyzed anodic oxidation of 5-(hydroxymethyl)-furfural under non-alkaline conditions
Source: Royal Society of Chemistry journal article supplement (doi:10.1039/d4su00050a), 2024-01-01
Supplement: d4su00050a1.pdf [file d4su00050a1.pdf]

## Supporting Information

### Definition of performance parameters

Eqs. (S1) – (S3) were used to calculate the HMF conversion  $X$ , the product yield  $Y$  and the Coulomb efficiencies  $CE$ . The total Coulomb efficiency  $CE_{\text{tot}}$  was calculated from the  $CE$  values of the single products according to eq. S4. For all equations, a stoichiometric coefficient of  $\nu = 1$  is assumed.

$$X = \frac{n_{\text{educt}, 0} - n_{\text{educt}, t}}{n_{\text{educt}, 0}} \cdot 100 \% \quad (\text{S1})$$

$$Y = \frac{n_{\text{product}, t}}{n_{\text{educt}, 0}} \cdot 100 \% \quad (\text{S2})$$

$$CE = \frac{Q_{\text{ideal}}}{Q_{\text{experiment}}} \cdot 100 \% = \frac{n_{\text{product}, t} \cdot z \cdot F}{Q_{\text{experiment}}} \cdot 100 \% \quad (\text{S3})$$

$$CE_{\text{tot}} = CE_{\text{DFF}} + CE_{\text{HMFA}} + CE_{\text{FFCA}} + CE_{\text{FDCA}} \quad (\text{S4})$$

|                           |                                                 |
|---------------------------|-------------------------------------------------|
| $n_{\text{educt}, 0}$ :   | amount of educt at the start of the reaction    |
| $n_{\text{educt}, t}$ :   | amount of educt at the end of the reaction      |
| $n_{\text{product}, t}$ : | amount of product at the end of the reaction    |
| $Q_{\text{ideal}}$ :      | charge necessary for full conversion to product |
| $Q_{\text{experiment}}$ : | total charge transferred during the experiment  |
| $z$ :                     | number of electrons                             |
| $F$ :                     | Faraday's constant                              |

## Additional Figures

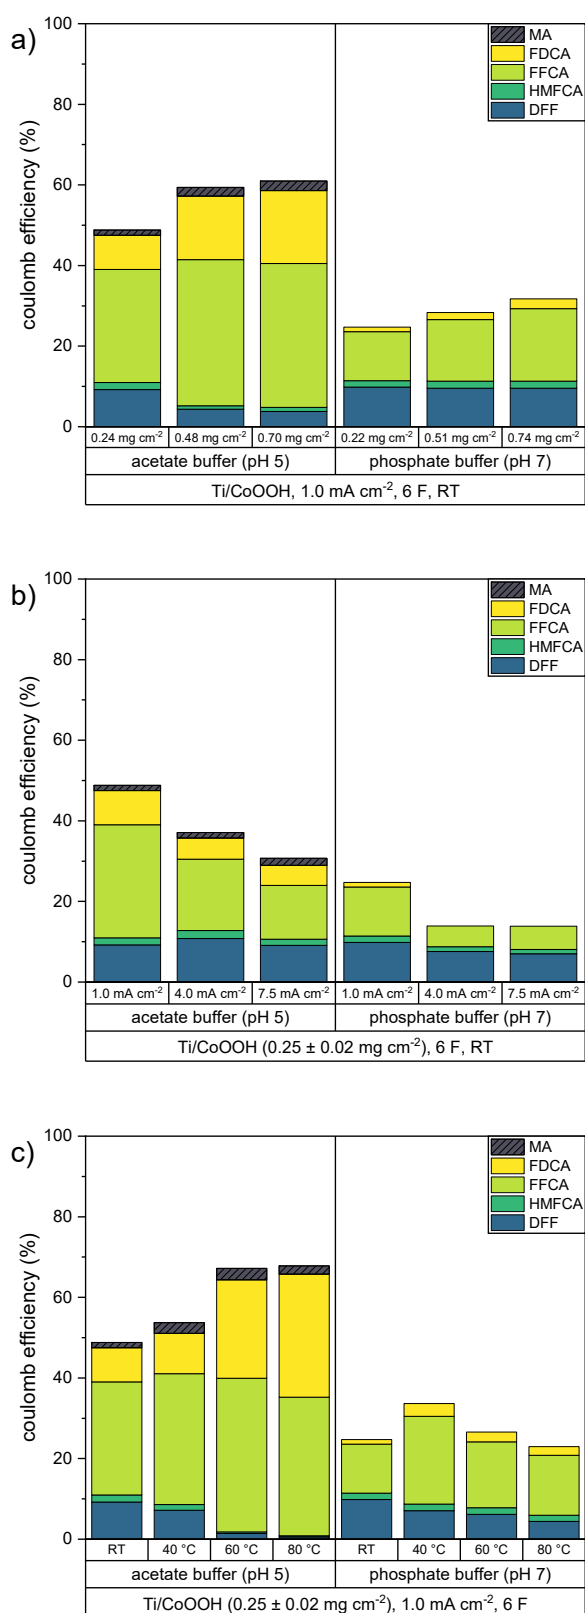

Figure S1: Coulomb efficiencies ( $CE$ ) of the single products obtained during the galvanostatic reactions with a) different CoOOH loadings, b) different current densities and c) different electrolyte temperatures. The  $CE$  values of DFF, HMFCA, FFCA and FDCA were summed up to form the total Coulomb efficiency ( $CE_{tot}$ ). To calculate the  $CE$  of MA, full oxidation of the two  $C_1$  products to  $CO_2$  was assumed, resulting in a transport of  $12 e^-$  per molecule.

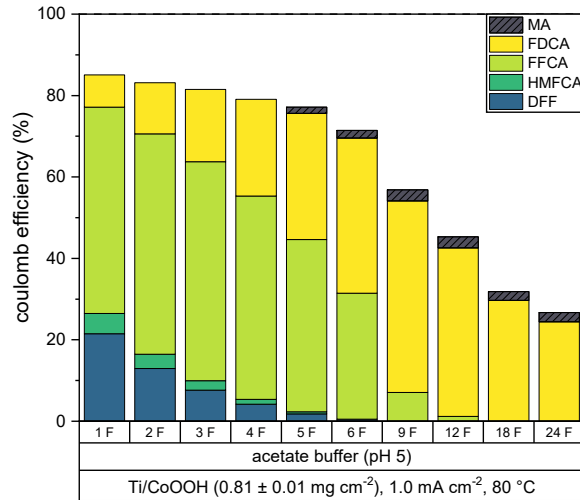

Figure S2: Coulomb efficiencies (CE) of the reaction under optimized conditions. The CE values of DFF, HMFCFA, FFCA and FDCA were summed up to form the total Coulomb efficiency ( $CE_{tot}$ ). To calculate the CE of MA, full oxidation of the two  $C_1$  products to  $CO_2$  was assumed, resulting in a transport of  $12 e^-$  per molecule.

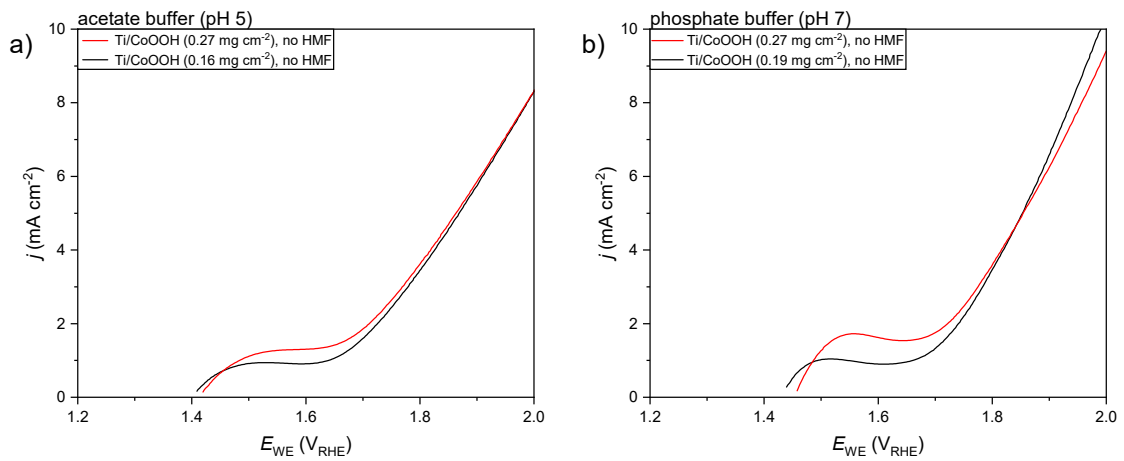

Figure S3: Linear sweep voltammograms of Ti/CoOOH of different catalyst loadings in a) acetate buffer (pH 5) and b) phosphate buffer (pH 7).

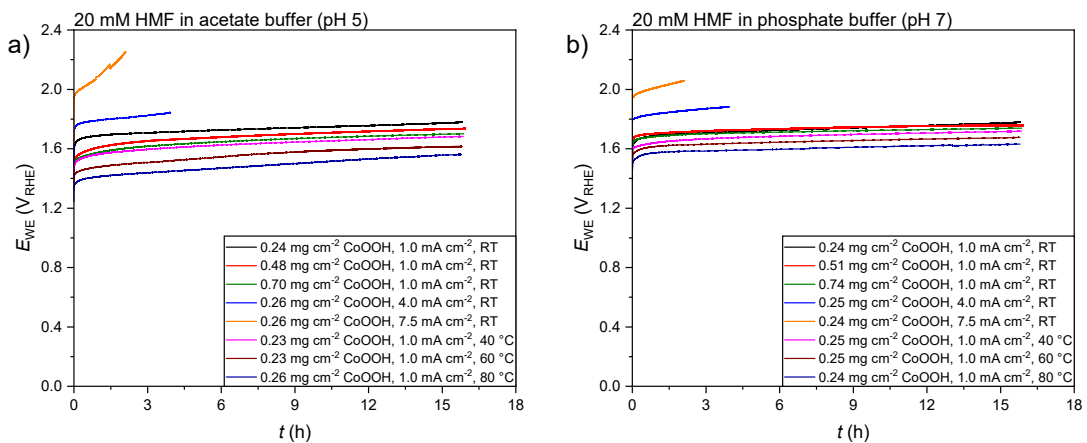

Figure S4: Exemplary potential curves of the HMF oxidation experiments with different parameters in a) the acetate buffer (pH 5) and b) in the phosphate buffer (pH 7).

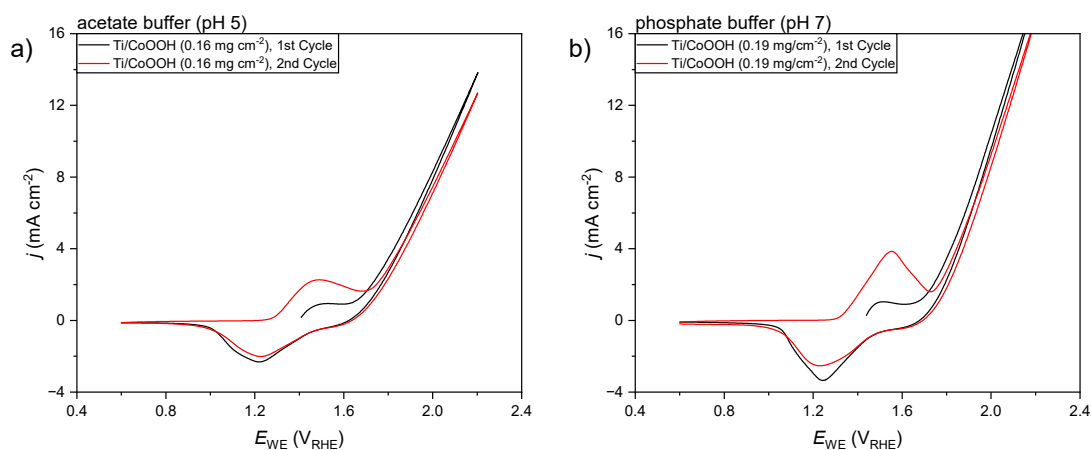

Figure S5: Cyclic voltammograms of Ti/CoOOH in a) acetate buffer (pH 5) and b) phosphate buffer (pH 7). Measurements were recorded starting from the open circuit potential (scan rate: 10 mV s<sup>-1</sup>).

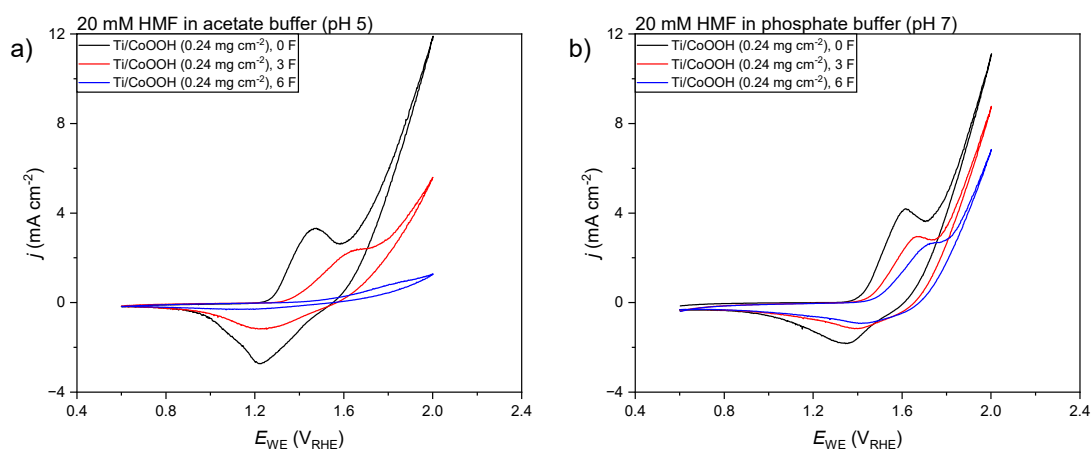

Figure S6: Cyclic voltammograms of Ti/CoOOH in 20 mM HMF solutions of a) acetate buffer (pH 5) and b) phosphate buffer (pH 7) obtained before (0 F), in the middle (3 F) and at the end (6 F) of a galvanostatic experiment at 1.0 mA cm<sup>-2</sup>. Measurements were recorded starting from the respective open circuit potentials for two cycles (scan rate: 10 mV s<sup>-1</sup>). The second cycles are depicted here.

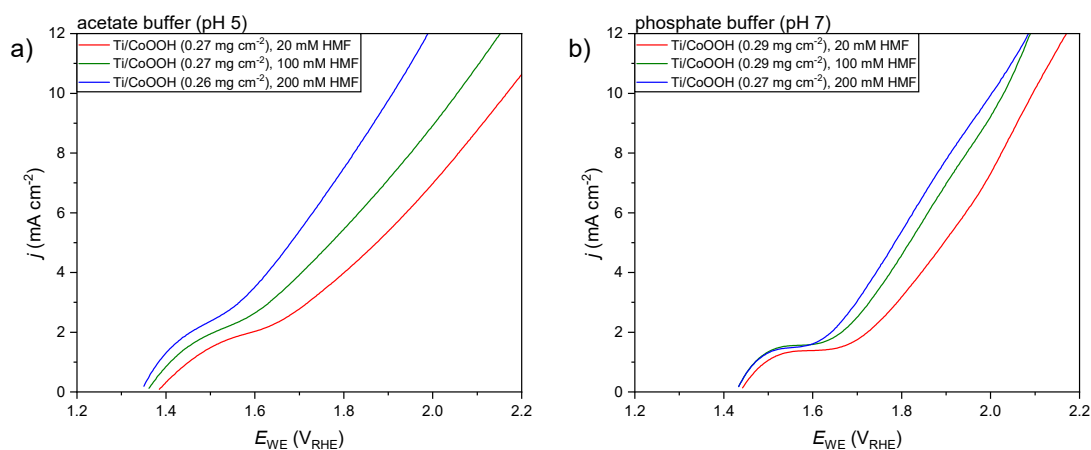

Figure S7: Linear sweep voltammograms of Ti/CoOOH in HMF solutions of a) acetate buffer (pH 5) and b) phosphate buffer (pH 7) at different HMF concentrations.

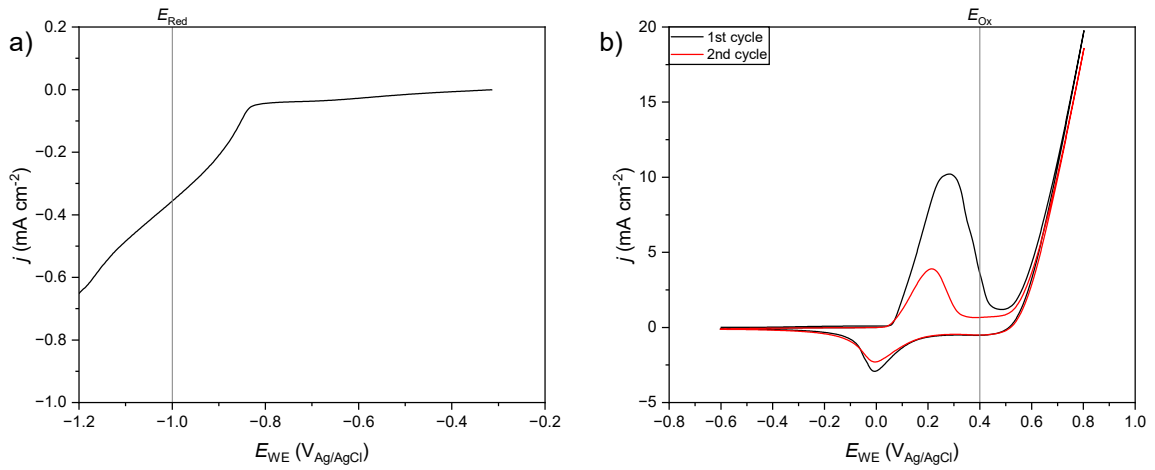

Figure S8: a) Linear sweep voltammogram of Ti in 0.05 M Co(NO<sub>3</sub>)<sub>2</sub> solution, b) cyclic voltammogram of Ti/Co(OH)<sub>2</sub> in 1.0 M NaOH. Constant potentials used for Co(OH)<sub>2</sub> deposition and oxidation are indicated (scan rate: 10 mV s<sup>-1</sup>).

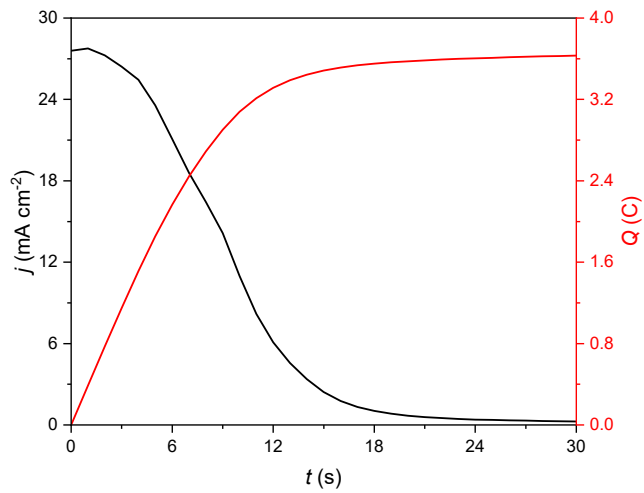

Figure S9: Exemplary current density and charge curves of a Ti/Co(OH)<sub>2</sub> oxidation in 1.0 M NaOH by application of 0.4 V<sub>Ag/AgCl</sub>. The Co(OH)<sub>2</sub> film was deposited via reduction of a 0.05 M Co(NO<sub>3</sub>)<sub>2</sub> solution at -1.0 V<sub>Ag/AgCl</sub> with a transported charge density of 0.8 C cm<sup>-2</sup>.

## Additional Tables

Table S1: Performance parameters of the HMF oxidation reactions under variation of the CoOOH loading  $m_{\text{CoOOH}}$  ( $j = 1.0 \text{ mA cm}^{-2}$ , RT, 6 F transported). Mean values and standard deviations of duplicate reactions are given.\*

|                         | $m_{\text{CoOOH}} \text{ (mg cm}^{-2}\text{)}$ | $X \text{ (%)}$ | $MB \text{ (%)}$ | $\alpha_{\text{CoOOH}} \text{ (%)}$ | Product | $Y \text{ (%)}$ | $CE \text{ (%)}$ |
|-------------------------|------------------------------------------------|-----------------|------------------|-------------------------------------|---------|-----------------|------------------|
| Acetate buffer (pH 5)   | $0.24 \pm 0.00$                                | $89.9 \pm 1.6$  | $92.1 \pm 1.7$   | $90.1 \pm 2.2$                      | DFF     | $27.0 \pm 4.3$  | $9.2 \pm 1.5$    |
|                         |                                                |                 |                  |                                     | HMFCFA  | $5.2 \pm 0.4$   | $1.8 \pm 0.1$    |
|                         |                                                |                 |                  |                                     | FFCA    | $41.0 \pm 2.8$  | $28.1 \pm 1.9$   |
|                         |                                                |                 |                  |                                     | FDCA    | $8.3 \pm 1.7$   | $8.5 \pm 1.8$    |
|                         |                                                |                 |                  |                                     | MA**    | $0.6 \pm 0.1$   | $1.3 \pm 0.3$    |
|                         | $0.48 \pm 0.01$                                | $95.6 \pm 0.2$  | $89.5 \pm 0.3$   | $83.5 \pm 1.8$                      | DFF     | $12.8 \pm 0.1$  | $4.4 \pm 0.0$    |
|                         |                                                |                 |                  |                                     | HMFCFA  | $2.4 \pm 0.0$   | $0.8 \pm 0.0$    |
|                         |                                                |                 |                  |                                     | FFCA    | $53.3 \pm 0.4$  | $36.3 \pm 0.3$   |
|                         |                                                |                 |                  |                                     | FDCA    | $15.5 \pm 0.0$  | $15.8 \pm 0.0$   |
|                         |                                                |                 |                  |                                     | MA**    | $1.0 \pm 0.0$   | $2.1 \pm 0.1$    |
|                         | $0.70 \pm 0.01$                                | $95.8 \pm 0.6$  | $89.8 \pm 0.3$   | $87.5 \pm 0.5$                      | DFF     | $11.2 \pm 1.1$  | $3.8 \pm 0.4$    |
|                         |                                                |                 |                  |                                     | HMFCFA  | $2.9 \pm 0.1$   | $1.0 \pm 0.0$    |
|                         |                                                |                 |                  |                                     | FFCA    | $52.3 \pm 1.0$  | $35.7 \pm 0.8$   |
|                         |                                                |                 |                  |                                     | FDCA    | $17.8 \pm 1.1$  | $18.1 \pm 1.2$   |
|                         |                                                |                 |                  |                                     | MA**    | $1.1 \pm 0.0$   | $2.3 \pm 0.0$    |
| Phosphate buffer (pH 7) | $0.22 \pm 0.01$                                | $58.4 \pm 3.1$  | $93.9 \pm 0.1$   | $99.0 \pm 0.2$                      | DFF     | $28.7 \pm 1.0$  | $9.8 \pm 0.3$    |
|                         |                                                |                 |                  |                                     | HMFCFA  | $4.7 \pm 0.3$   | $1.6 \pm 0.1$    |
|                         |                                                |                 |                  |                                     | FFCA    | $17.8 \pm 1.8$  | $12.2 \pm 1.2$   |
|                         |                                                |                 |                  |                                     | FDCA    | $1.1 \pm 0.2$   | $1.1 \pm 0.2$    |
|                         |                                                |                 |                  |                                     | MA**    | 0.0             | 0.0              |
|                         | $0.51 \pm 0.00$                                | $64.3 \pm 5.6$  | $93.0 \pm 1.4$   | $99.3 \pm 0.2$                      | DFF     | $28.1 \pm 0.7$  | $9.6 \pm 0.3$    |
|                         |                                                |                 |                  |                                     | HMFCFA  | $5.1 \pm 0.1$   | $1.7 \pm 0.0$    |
|                         |                                                |                 |                  |                                     | FFCA    | $22.4 \pm 4.3$  | $15.3 \pm 2.9$   |
|                         |                                                |                 |                  |                                     | FDCA    | $1.7 \pm 0.5$   | $1.7 \pm 0.6$    |
|                         |                                                |                 |                  |                                     | MA**    | 0.0             | 0.0              |
|                         | $0.74 \pm 0.00$                                | $67.2 \pm 3.1$  | $94.3 \pm 1.1$   | $98.5 \pm 0.2$                      | DFF     | $27.8 \pm 1.0$  | $9.5 \pm 0.4$    |
|                         |                                                |                 |                  |                                     | HMFCFA  | $5.2 \pm 0.0$   | $1.8 \pm 0.0$    |
|                         |                                                |                 |                  |                                     | FFCA    | $26.2 \pm 2.4$  | $18.0 \pm 1.6$   |
|                         |                                                |                 |                  |                                     | FDCA    | $2.4 \pm 0.5$   | $2.5 \pm 0.5$    |
|                         |                                                |                 |                  |                                     | MA**    | 0.0             | 0.0              |

Table S2: Performance parameters of the HMF oxidation reactions under variation of the current density  $j$  ( $m_{\text{CoOOH}} = 0.25 \pm 0.02 \text{ mg cm}^{-2}$ , RT, 6 F transported). Mean values and standard deviations of duplicate reactions are given.\*

|                         | $j$ (mA cm <sup>-2</sup> ) | $X$ (%)    | $MB$ (%)   | $\alpha_{\text{CoOOH}}$ (%) | Product | $Y$ (%)    | $CE$ (%)   |
|-------------------------|----------------------------|------------|------------|-----------------------------|---------|------------|------------|
| Acetate buffer (pH 5)   | 4.0                        | 73.7 ± 2.8 | 94.9 ± 1.7 | 90.0 ± 2.6                  | DFF     | 31.4 ± 2.0 | 10.8 ± 0.7 |
|                         |                            |            |            |                             | HMFCA   | 5.7 ± 0.4  | 2.0 ± 0.1  |
|                         |                            |            |            |                             | FFCA    | 25.7 ± 2.1 | 17.7 ± 1.5 |
|                         |                            |            |            |                             | FDCA    | 5.0 ± 1.2  | 5.2 ± 1.3  |
|                         |                            |            |            |                             | MA**    | 0.7 ± 0.2  | 1.4 ± 0.3  |
|                         | 7.5                        | 59.4 ± 3.5 | 94.6 ± 0.6 | 89.0 ± 0.8                  | DFF     | 25.6 ± 1.0 | 9.1 ± 0.4  |
|                         |                            |            |            |                             | HMFCA   | 4.2 ± 0.2  | 1.5 ± 0.1  |
|                         |                            |            |            |                             | FFCA    | 18.8 ± 1.5 | 13.4 ± 1.2 |
|                         |                            |            |            |                             | FDCA    | 4.6 ± 0.3  | 5.0 ± 0.3  |
|                         |                            |            |            |                             | MA**    | 0.8 ± 0.1  | 1.8 ± 0.2  |
| Phosphate buffer (pH 7) | 4.0                        | 36.6 ± 1.8 | 96.7 ± 0.4 | 98.5 ± 0.5                  | DFF     | 22.3 ± 0.3 | 7.6 ± 0.1  |
|                         |                            |            |            |                             | HMFCA   | 3.5 ± 0.1  | 1.2 ± 0.0  |
|                         |                            |            |            |                             | FFCA    | 7.5 ± 0.9  | 5.1 ± 0.7  |
|                         |                            |            |            |                             | FDCA    | n.q.       | n.q.       |
|                         |                            |            |            |                             | MA**    | 0.0        | 0.0        |
|                         | 7.5                        | 36.7 ± 4.7 | 95.7 ± 1.1 | 98.7 ± 0.2                  | DFF     | 20.8 ± 1.0 | 7.0 ± 0.3  |
|                         |                            |            |            |                             | HMFCA   | 3.1 ± 0.1  | 1.1 ± 0.0  |
|                         |                            |            |            |                             | FFCA    | 8.5 ± 2.5  | 5.8 ± 1.6  |
|                         |                            |            |            |                             | FDCA    | n.q.       | n.q.       |
|                         |                            |            |            |                             | MA**    | 0.0        | 0.0        |

n.q. = not quantifiable

Table S3: Performance parameters of the HMF oxidation reactions under variation of the temperature  $T$  ( $j = 1.0 \text{ mA cm}^{-2}$ ,  $m_{\text{CoOOH}} = 0.25 \pm 0.02 \text{ mg cm}^{-2}$ , 6 F transported). Mean values and standard deviations of duplicate reactions are given.\*

|                         | $T$ (°C) | $X$ (%)    | $MB$ (%)   | $\alpha_{\text{CoOOH}}$ (%) | Product    | $Y$ (%)    | $CE$ (%)   |
|-------------------------|----------|------------|------------|-----------------------------|------------|------------|------------|
| Acetate buffer (pH 5)   | 40       | 93.3 ± 2.8 | 90.2 ± 0.8 | 87.5 ± 3.8                  | DFF        | 20.9 ± 6.7 | 7.2 ± 2.3  |
|                         |          |            |            |                             | HMFCA      | 4.2 ± 0.8  | 1.4 ± 0.3  |
|                         |          |            |            |                             | FFCA       | 47.4 ± 5.9 | 32.5 ± 4.0 |
|                         |          |            |            |                             | FDCA       | 9.7 ± 4.0  | 10.0 ± 4.1 |
|                         |          |            |            |                             | MA**       | 1.3 ± 0.4  | 2.7 ± 0.7  |
|                         | 60       | 98.9 ± 0.4 | 86.8 ± 1.6 | 84.3 ± 2.8                  | DFF        | 4.1 ± 1.9  | 1.4 ± 0.6  |
|                         |          |            |            |                             | HMFCA      | 1.1 ± 0.3  | 0.4 ± 0.1  |
|                         |          |            |            |                             | FFCA       | 55.5 ± 2.0 | 38.2 ± 1.3 |
|                         |          |            |            |                             | FDCA       | 23.6 ± 2.9 | 24.4 ± 3.0 |
|                         |          |            |            |                             | MA**       | 1.4 ± 0.1  | 2.8 ± 0.3  |
|                         | 80       | 99.2 ± 0.1 | 84.9 ± 0.5 | 77.2 ± 4.0                  | DFF        | 1.7 ± 0.2  | 0.6 ± 0.1  |
|                         |          |            |            |                             | HMFCA      | 0.7 ± 0.0  | 0.3 ± 0.0  |
| FFCA                    |          |            |            |                             | 50.7 ± 0.3 | 34.4 ± 0.0 |            |
| FDCA                    |          |            |            |                             | 29.7 ± 0.7 | 30.5 ± 0.8 |            |
| MA**                    |          |            |            |                             | 1.0 ± 0.1  | 2.0 ± 0.1  |            |
| Phosphate buffer (pH 7) | 40       | 76.7 ± 3.2 | 83.8 ± 1.3 | 96.8 ± 1.0                  | DFF        | 20.7 ± 1.9 | 7.1 ± 0.7  |
|                         |          |            |            |                             | HMFCA      | 4.9 ± 0.1  | 1.7 ± 0.0  |
|                         |          |            |            |                             | FFCA       | 31.9 ± 2.9 | 21.8 ± 1.9 |
|                         |          |            |            |                             | FDCA       | 3.1 ± 0.9  | 3.2 ± 0.9  |
|                         |          |            |            |                             | MA**       | 0.0        | 0.0        |
|                         | 60       | 68.9 ± 7.9 | 80.3 ± 2.1 | 97.3 ± 1.6                  | DFF        | 18.2 ± 2.6 | 6.2 ± 0.9  |
|                         |          |            |            |                             | HMFCA      | 4.8 ± 0.2  | 1.6 ± 0.1  |
|                         |          |            |            |                             | FFCA       | 23.9 ± 7.1 | 16.3 ± 4.9 |
|                         |          |            |            |                             | FDCA       | 2.4 ± 1.4  | 2.4 ± 1.5  |
|                         |          |            |            |                             | MA**       | 0.0        | 0.0        |
|                         | 80       | 69.4 ± 3.4 | 72.9 ± 1.8 | 99.6 ± 0.1                  | DFF        | 13.2 ± 1.6 | 4.4 ± 0.5  |
|                         |          |            |            |                             | HMFCA      | 4.7 ± 0.1  | 1.6 ± 0.0  |
| FFCA                    |          |            |            |                             | 22.3 ± 2.7 | 14.9 ± 1.9 |            |
| FDCA                    |          |            |            |                             | 2.1 ± 0.5  | 2.1 ± 0.6  |            |
| MA**                    |          |            |            |                             | 0.0        | 0.0        |            |

\* Although standard deviations should generally only be used for at least three replicates, we chose these values for a better comparability with the respective reaction performance data.

\*\* To calculate the  $CE$  of MA, full oxidation of the two  $C_1$  products to  $\text{CO}_2$  was assumed, resulting in a transport of 12  $e^-$  per molecule.



Table S4: Performance parameters of a HMF oxidation under optimized conditions (20 mM HMF in acetate buffer (pH 5),  $j = 1.0 \text{ mA cm}^{-2}$ ,  $80 \text{ }^\circ\text{C}$ ,  $m_{\text{CoOOH}} = 0.81 \pm 0.01 \text{ mg cm}^{-2}$ ). Mean values and standard deviations of duplicate reactions are given.\*

|             | <i>X</i> (%) | <i>MB</i> (%) | $\alpha_{\text{CoOOH}}$ (%) | Product | <i>Y</i> (%) | <i>CE</i> (%) |
|-------------|--------------|---------------|-----------------------------|---------|--------------|---------------|
| <b>1 F</b>  | 28.8 ± 0.5   | 98.5 ± 0.7    | -                           | DFF     | 10.8 ± 0.2   | 21.5 ± 0.3    |
|             |              |               |                             | HMFCFA  | 2.5 ± 0.2    | 5.0 ± 0.4     |
|             |              |               |                             | FFCA    | 12.7 ± 0.0   | 50.7 ± 0.1    |
|             |              |               |                             | FDCA    | 1.3 ± 0.2    | 7.9 ± 1.0     |
|             |              |               |                             | MA**    | n.q.         | n.q.          |
| <b>2 F</b>  | 52.2 ± 0.1   | 95.6 ± 0.8    | -                           | DFF     | 13.0 ± 0.5   | 13.0 ± 0.5    |
|             |              |               |                             | HMFCFA  | 3.5 ± 0.2    | 3.5 ± 0.2     |
|             |              |               |                             | FFCA    | 27.1 ± 0.1   | 54.1 ± 0.1    |
|             |              |               |                             | FDCA    | 4.2 ± 0.2    | 12.6 ± 0.5    |
|             |              |               |                             | MA**    | n.q.         | n.q.          |
| <b>3 F</b>  | 71.4 ± 0.1   | 92.5 ± 0.5    | -                           | DFF     | 11.4 ± 0.5   | 7.6 ± 0.3     |
|             |              |               |                             | HMFCFA  | 3.4 ± 0.2    | 2.3 ± 0.1     |
|             |              |               |                             | FFCA    | 40.2 ± 0.0   | 53.8 ± 0.1    |
|             |              |               |                             | FDCA    | 8.9 ± 0.3    | 17.8 ± 0.6    |
|             |              |               |                             | MA**    | n.q.         | n.q.          |
| <b>4 F</b>  | 86.2 ± 0.0   | 89.6 ± 0.6    | -                           | DFF     | 8.3 ± 0.3    | 4.2 ± 0.2     |
|             |              |               |                             | HMFCFA  | 2.4 ± 0.3    | 1.2 ± 0.1     |
|             |              |               |                             | FFCA    | 49.5 ± 0.1   | 49.9 ± 0.2    |
|             |              |               |                             | FDCA    | 15.7 ± 0.4   | 23.7 ± 0.6    |
|             |              |               |                             | MA**    | n.q.         | n.q.          |
| <b>5 F</b>  | 95.5 ± 0.1   | 88.7 ± 1.0    | -                           | DFF     | 4.4 ± 0.2    | 1.8 ± 0.1     |
|             |              |               |                             | HMFCFA  | 1.3 ± 0.2    | 0.5 ± 0.1     |
|             |              |               |                             | FFCA    | 52.2 ± 0.1   | 42.3 ± 0.1    |
|             |              |               |                             | FDCA    | 25.5 ± 0.4   | 31.0 ± 0.6    |
|             |              |               |                             | MA**    | 0.6 ± 0.0    | 1.5 ± 0.1     |
| <b>6 F</b>  | 99.0 ± 0.1   | 86.5 ± 1.2    | -                           | DFF     | 1.4 ± 0.3    | 0.5 ± 0.1     |
|             |              |               |                             | HMFCFA  | n.q.         | n.q.          |
|             |              |               |                             | FFCA    | 45.7 ± 0.5   | 31.0 ± 0.4    |
|             |              |               |                             | FDCA    | 37.6 ± 0.3   | 38.2 ± 0.3    |
|             |              |               |                             | MA**    | 0.9 ± 0.1    | 1.9 ± 0.3     |
| <b>9 F</b>  | 100.0        | 86.8 ± 1.6    | -                           | DFF     | n.q.         | n.q.          |
|             |              |               |                             | HMFCFA  | 0.0          | 0.0           |
|             |              |               |                             | FFCA    | 15.3 ± 1.5   | 7.0 ± 0.7     |
|             |              |               |                             | FDCA    | 69.2 ± 0.3   | 47.1 ± 0.1    |
|             |              |               |                             | MA**    | 2.0 ± 0.4    | 2.8 ± 0.5     |
| <b>12 F</b> | 100.0        | 86.9 ± 1.7    | -                           | DFF     | 0.0          | 0.0           |
|             |              |               |                             | HMFCFA  | 0.0          | 0.0           |
|             |              |               |                             | FFCA    | 3.4 ± 0.5    | 1.2 ± 0.2     |
|             |              |               |                             | FDCA    | 80.9 ± 0.7   | 41.4 ± 0.4    |
|             |              |               |                             | MA**    | 2.6 ± 0.4    | 2.7 ± 0.5     |
| <b>18 F</b> | 100.0        | 89.7 ± 1.9    | -                           | DFF     | 0.0          | 0.0           |
|             |              |               |                             | HMFCFA  | 0.0          | 0.0           |
|             |              |               |                             | FFCA    | 0.0          | 0.0           |
|             |              |               |                             | FDCA    | 86.6 ± 1.3   | 29.7 ± 0.5    |
|             |              |               |                             | MA**    | 3.2 ± 0.7    | 2.2 ± 0.5     |
| <b>24 F</b> | 100.0        | 99.1 ± 2.5    | 83.9 ± 2.8                  | DFF     | 0.0          | 0.0           |
|             |              |               |                             | HMFCFA  | 0.0          | 0.0           |
|             |              |               |                             | FFCA    | 0.0          | 0.0           |
|             |              |               |                             | FDCA    | 94.7 ± 1.4   | 24.5 ± 0.4    |
|             |              |               |                             | MA**    | 4.4 ± 1.1    | 2.2 ± 0.6     |

n.q. = not quantifiable
